# Supplementary material for: Psyllium Fiber Enhances Intestinal Antimicrobial Protein Expression via a Tuft Cell–ILC2 Axis in a Microbiota-Independent Manner
Source: Research Square preprint supplement (doi:10.21203/rs.3.rs-8605841/v1), 2026-02-06
Supplement: Supplementary file 1 [file 94f80777fbba5b44cc758262.pdf]

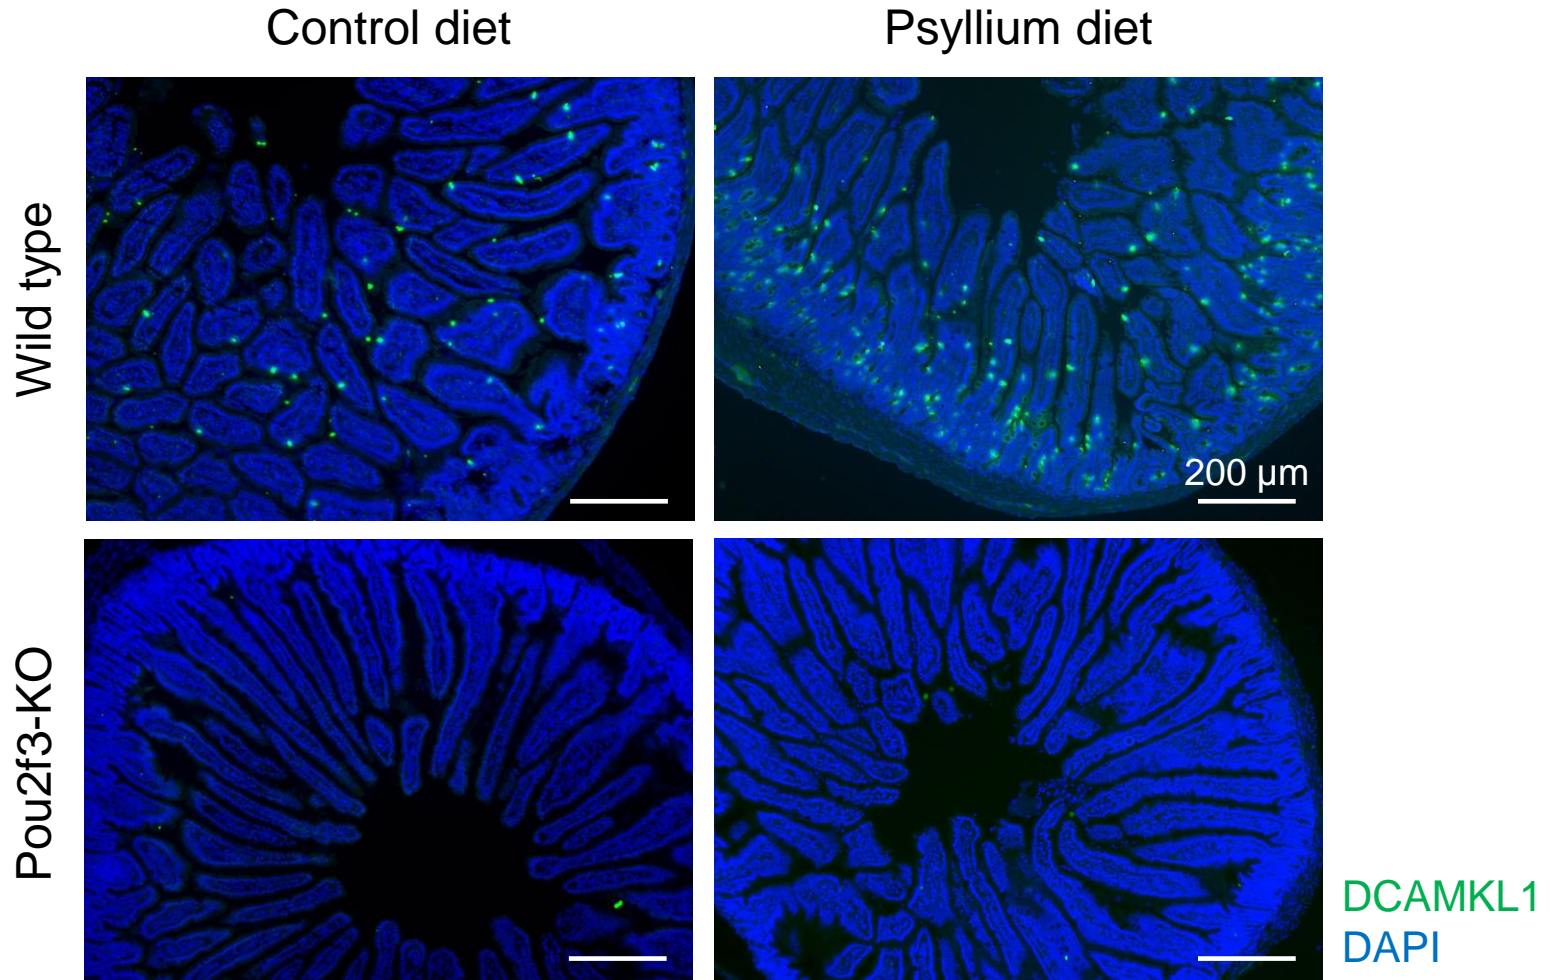

**Figure S1. | Tuft cell expression (DCAMKL1) in psyllium supplementation.**

Wild-type (WT) and tuft cell-deficient (Pou2f3-KO) mice were fed either a control diet or a 7.5% psyllium diet for 5 days. Representative immunofluorescence images of tuft cells marker (DCAMKL1, green), and counterstained with DAPI (blue) in jejunum.

## Jejunum

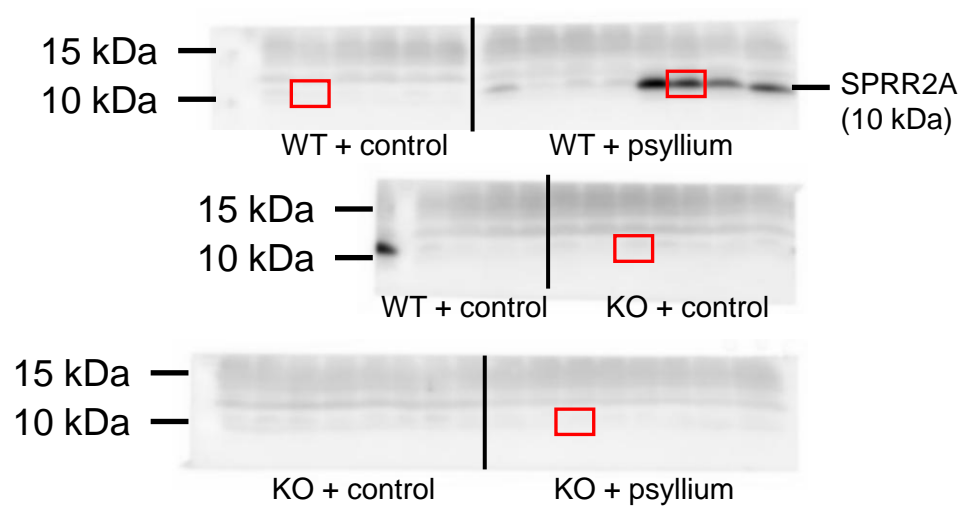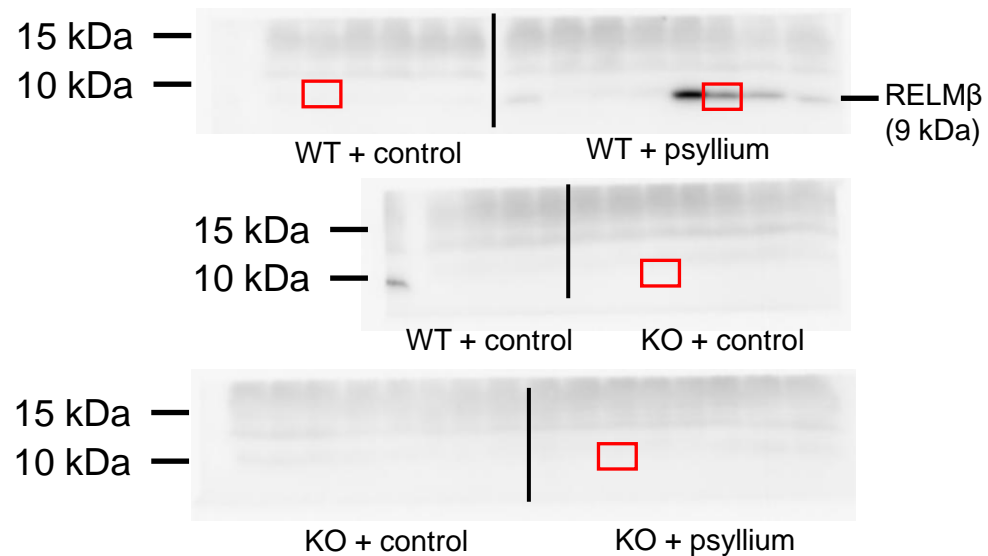

## Ileum

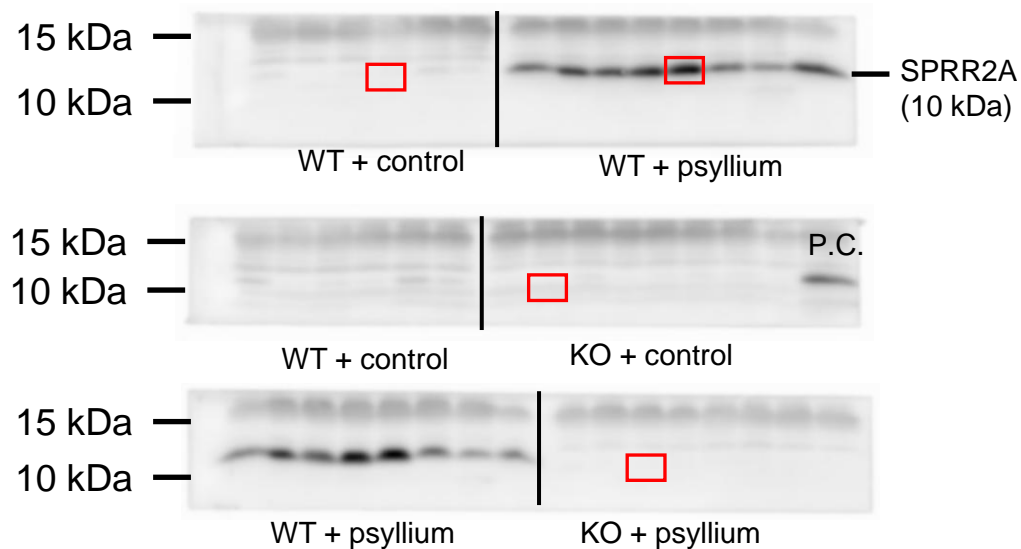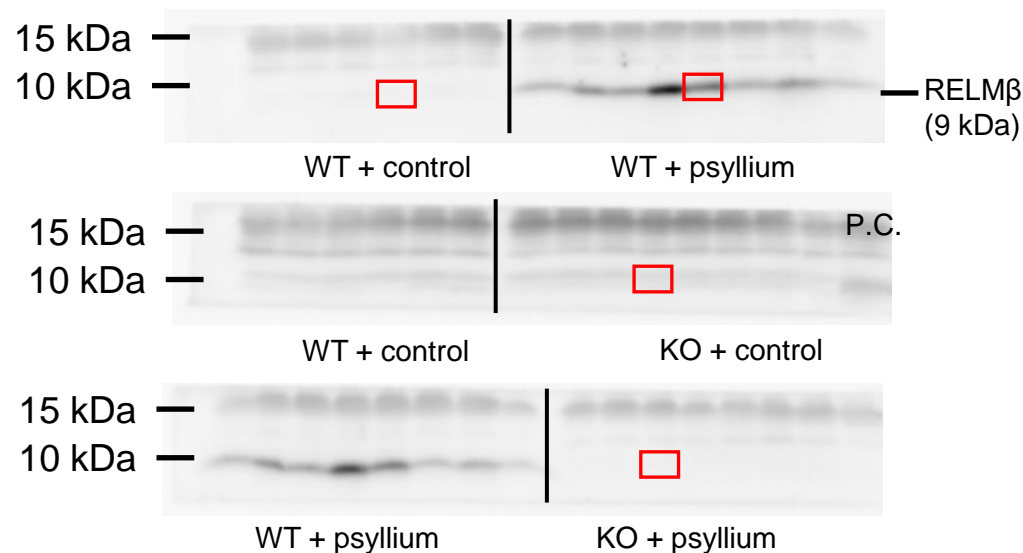

Supplementary Figure continues on the next page.

## Jejunum

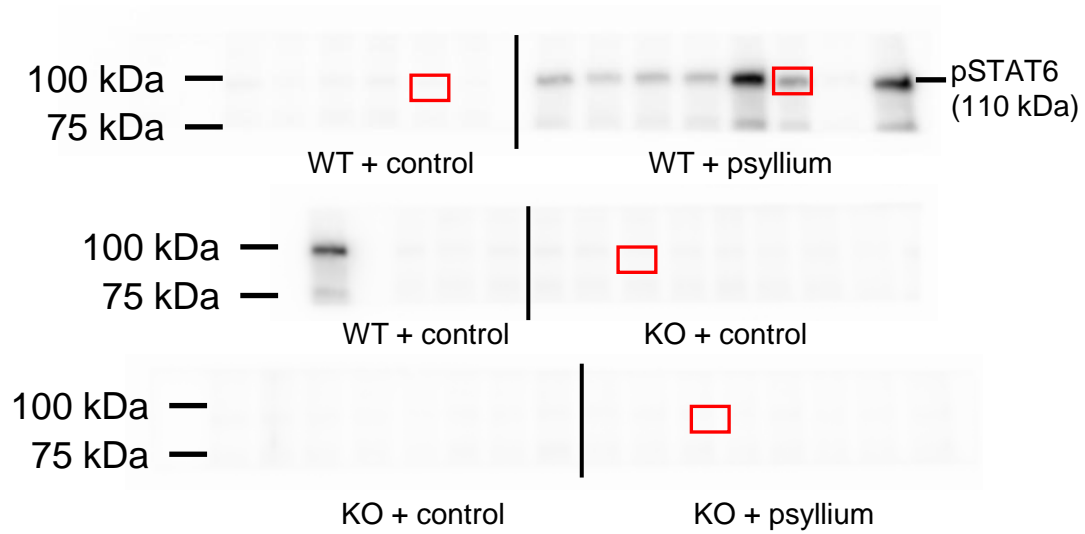

## Ileum

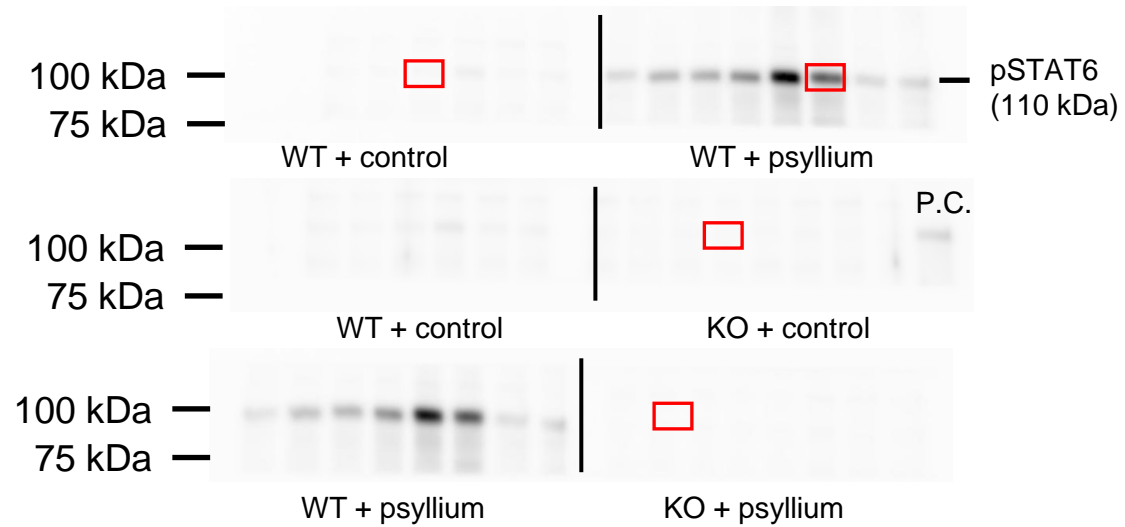

Supplementary Figure continues on the next page.

## Ponceau S staining

Jejunum

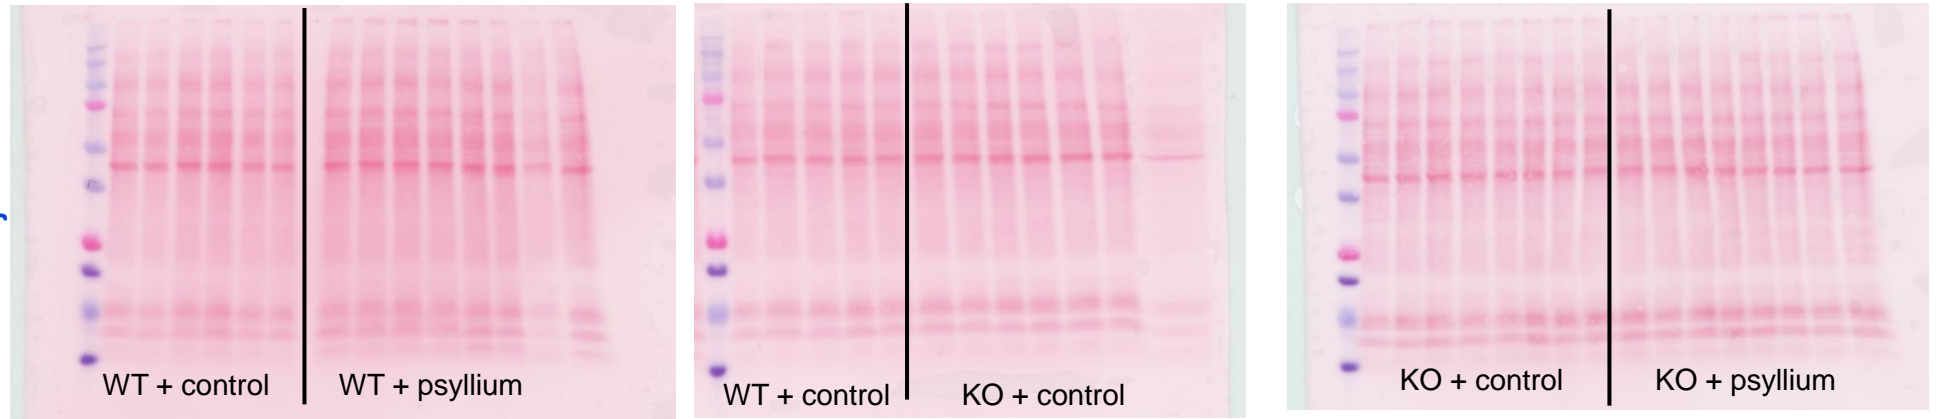

Ileum

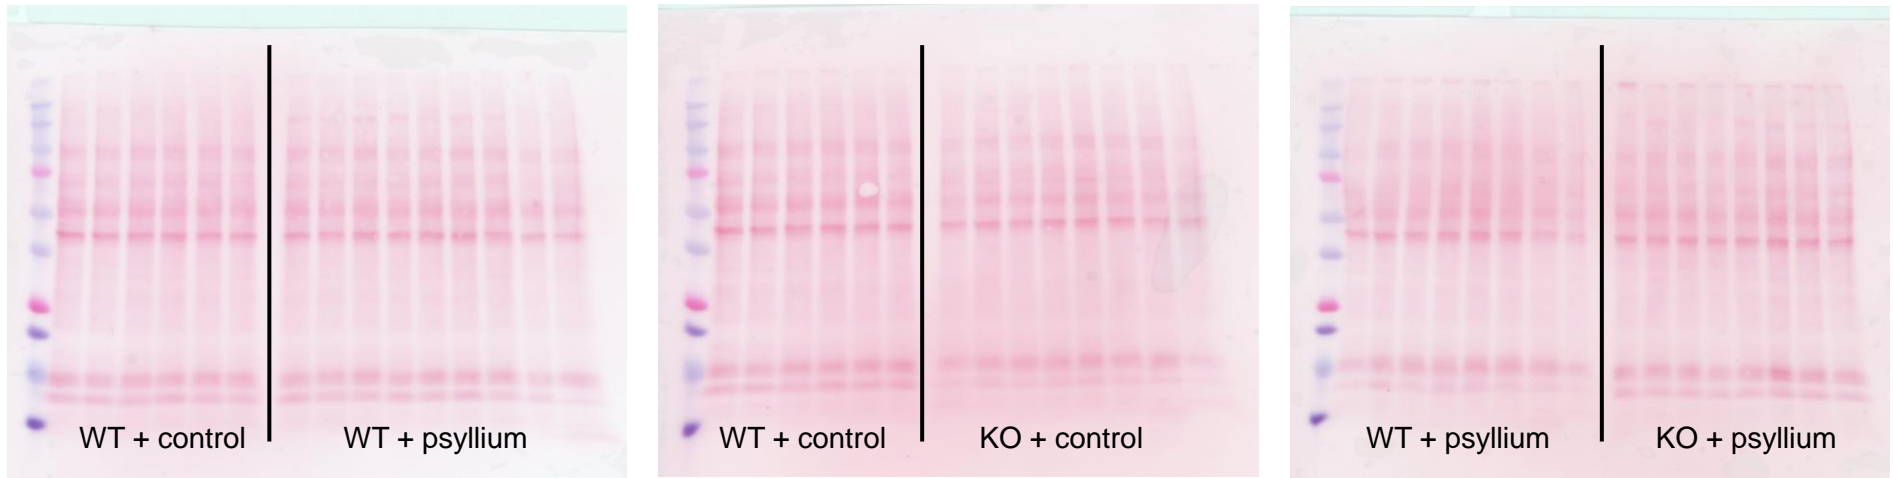

**Figure S2. | Uncropped and unprocessed immunoblot images corresponding to the immunoblots shown in Fig. 1 and 2.**

Wild-type (WT) and tuft cell-deficient (*Pou2f3*-KO) mice were fed either a control diet or a 7.5% psyllium diet for 5 days. Protein levels of SPRR2A, RELM $\beta$ , and STAT6 phosphorylation in the jejunum and ileum were assessed by immunoblotting (n = 6–8 per group). Immunoblot analyses for each target were performed using multiple gels run in parallel under identical experimental conditions. After transfer to PVDF membranes, total protein loading was visualized by Ponceau S staining and used for normalization. Membranes were cut horizontally according to molecular weight markers and probed separately with primary antibodies. Red boxes indicate the regions used for quantification and presentation in the main figures.



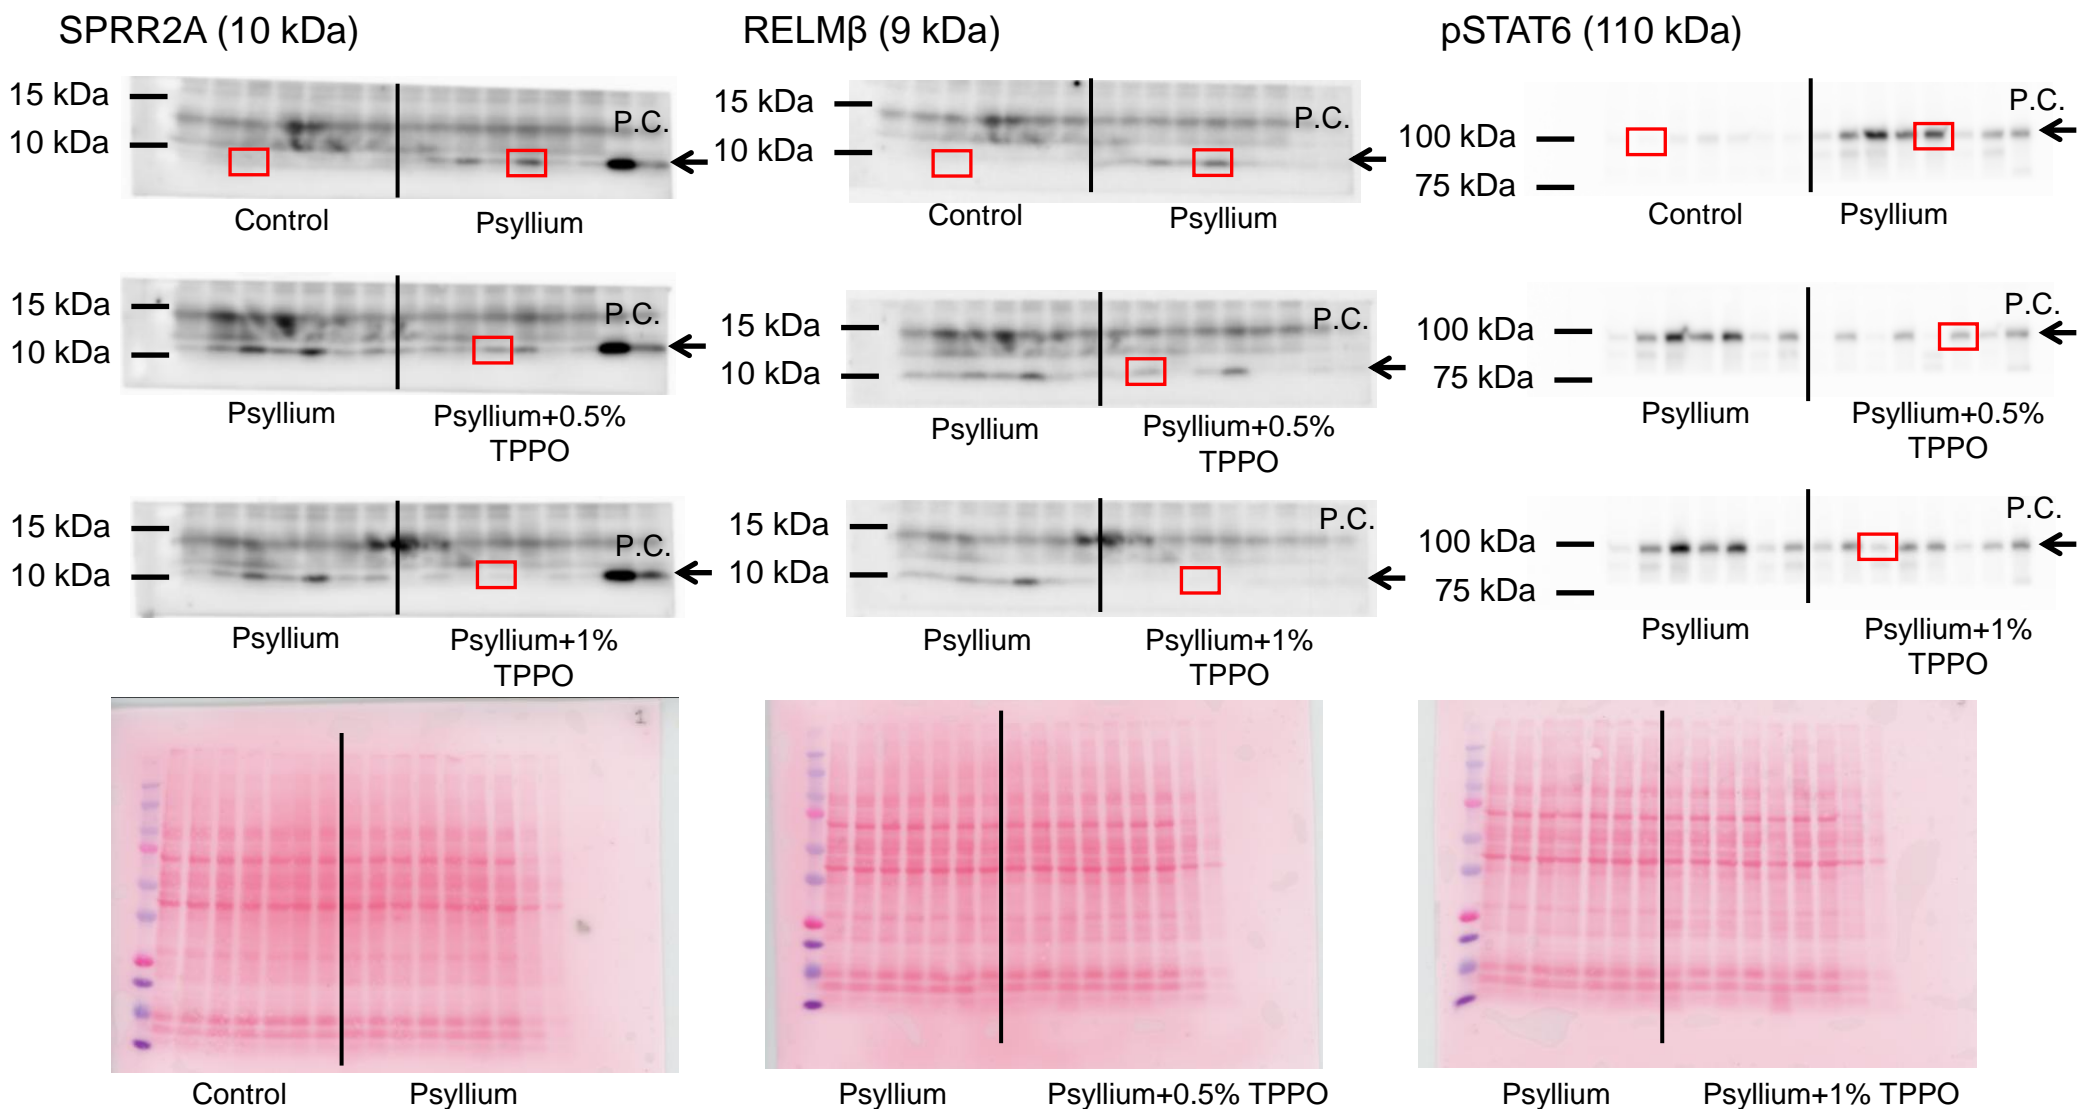

**Figure S3. | Uncropped and unprocessed immunoblot images corresponding to the immunoblots shown in Fig. 3.**

Mice were fed either a control diet or a 7.5% psyllium diet for 5 days. The TRPM5 inhibitor triphenylphosphine oxide (TPPO) was administered in the diet (0.5 or 1.0%, w/w), starting 1 day prior to psyllium feeding. Protein levels of SPRR2A, RELM $\beta$ , and STAT6 phosphorylation in the jejunum were assessed by immunoblotting (n = 7 per group). Immunoblot analyses for each target were performed using multiple gels run in parallel under identical experimental conditions. After transfer to PVDF membranes, total protein loading was visualized by Ponceau S staining and used for normalization. Membranes were cut horizontally according to molecular weight markers and probed separately with primary antibodies. Red boxes indicate the regions used for quantification and presentation in the main figures.

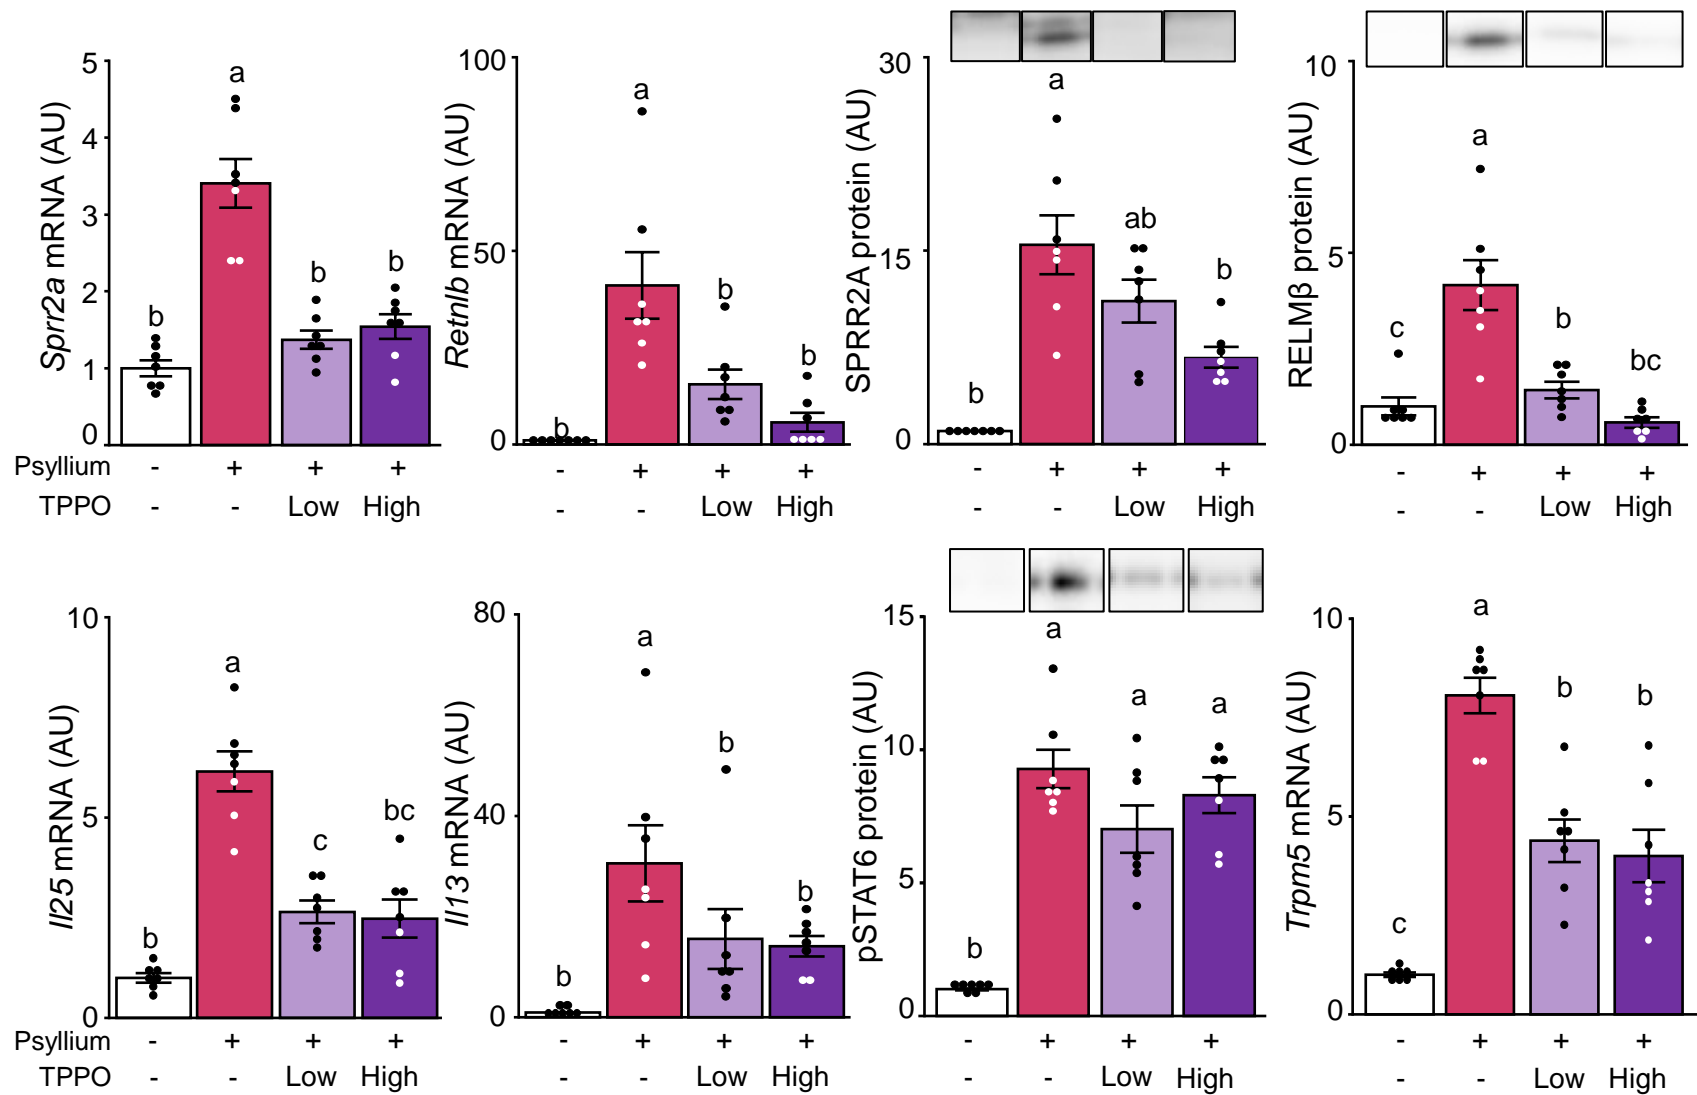

**Figure S4. | Inhibition of TRPM5 signaling suppresses psyllium-induced ILC2 activation.**

Mice were fed either a control diet or a 7.5% psyllium diet for 5 days. The TRPM5 inhibitor triphenylphosphine oxide (TPPO) was administered in the diet (0.5 or 1.0%, w/w), starting 1 day prior to psyllium feeding. Antimicrobial protein (SPRR2A, RELMβ), *Il25*, *Il13*, levels of STAT6 phosphorylation, and *Trpm5* expression was quantified by qRT-PCR or immunoblotting in mouse ileum (n=7 per group). Results are presented as mean ± s.e.m. Statistical significance was assessed by the Tukey–Kramer post-hoc test or the Steel–Dwass test. Groups not sharing a common letter are significantly different ( $p < 0.05$ ).

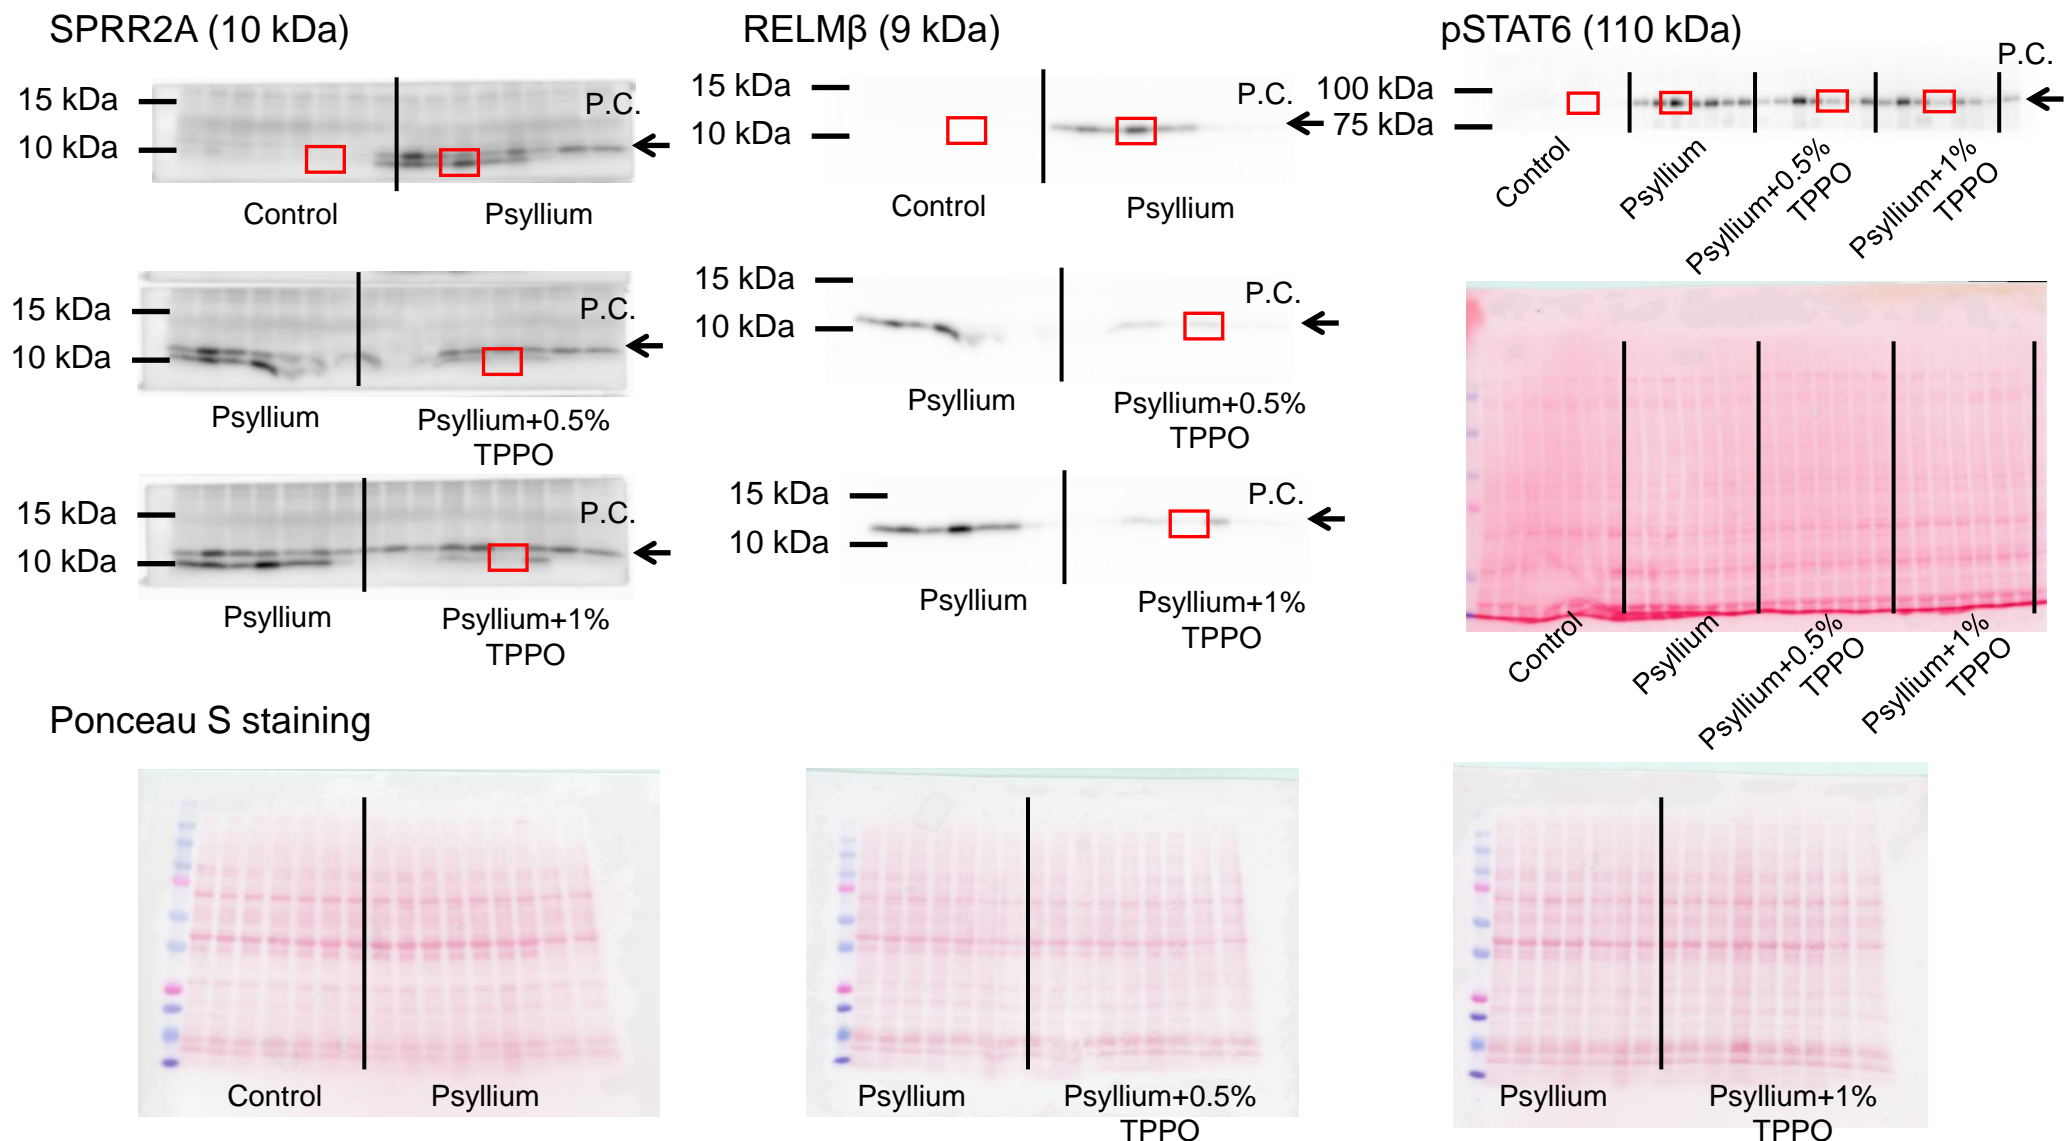

**Figure S5. | Uncropped and unprocessed immunoblot images corresponding to the immunoblots shown in Fig. S4.**

Mice were fed either a control diet or a 7.5% psyllium diet for 5 days. The TRPM5 inhibitor triphenylphosphine oxide (TPPO) was administered in the diet (0.5 or 1.0%, w/w), starting 1 day prior to psyllium feeding. Protein levels of SPRR2A, RELM $\beta$ , and STAT6 phosphorylation in the ileum were assessed by immunoblotting (n = 7 per group). Immunoblot analyses for each target were performed using multiple gels run in parallel under identical experimental conditions. After transfer to PVDF membranes, total protein loading was visualized by Ponceau S staining and used for normalization. Membranes were cut horizontally according to molecular weight markers and probed separately with primary antibodies.

### SPRR2A (10 kDa)

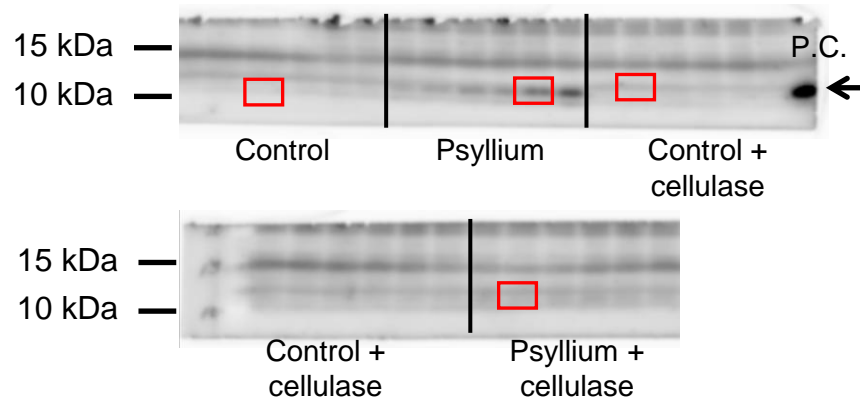

### RELM $\beta$ (9 kDa)

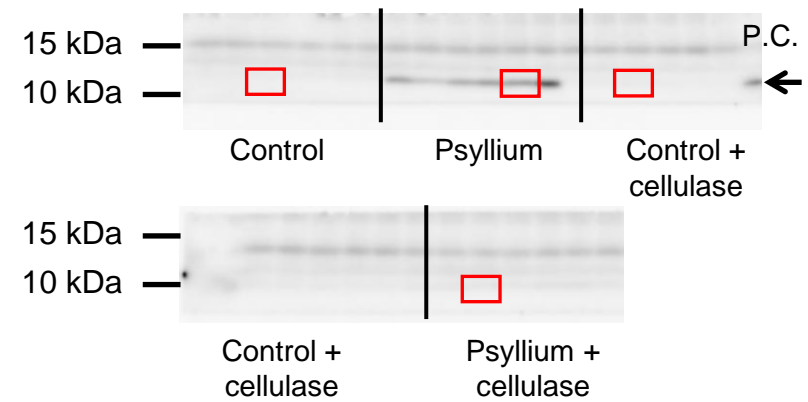

### pSTAT6 (110 kDa)

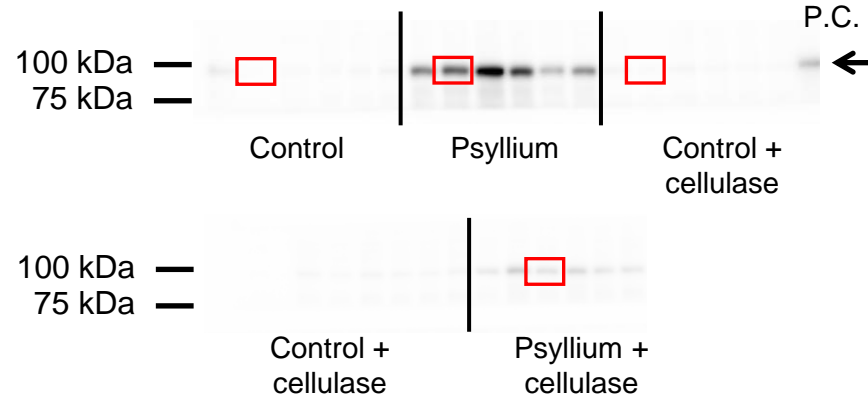

### Ponceau S staining

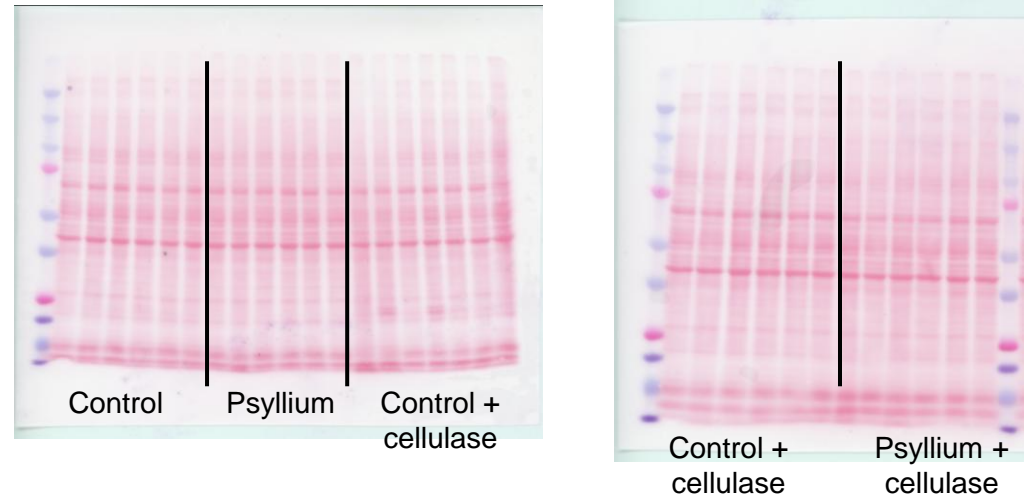

**Figure S6. | Uncropped and unprocessed immunoblot images corresponding to the immunoblots shown in Fig. 4.**

Mice were fed a 7.5% psyllium diet supplemented with and without cellulase preparation with xylanase activity for 5 days. Protein levels of SPRR2A, RELM $\beta$ , and STAT6 phosphorylation in the jejunum were assessed by immunoblotting (n = 6 per group). Immunoblot analyses for each target were performed using multiple gels run in parallel under identical experimental conditions. After transfer to PVDF membranes, total protein loading was visualized by Ponceau S staining and used for normalization. Membranes were cut horizontally according to molecular weight markers and probed separately with primary antibodies. Red boxes indicate the regions used for quantification and presentation in the main figures.



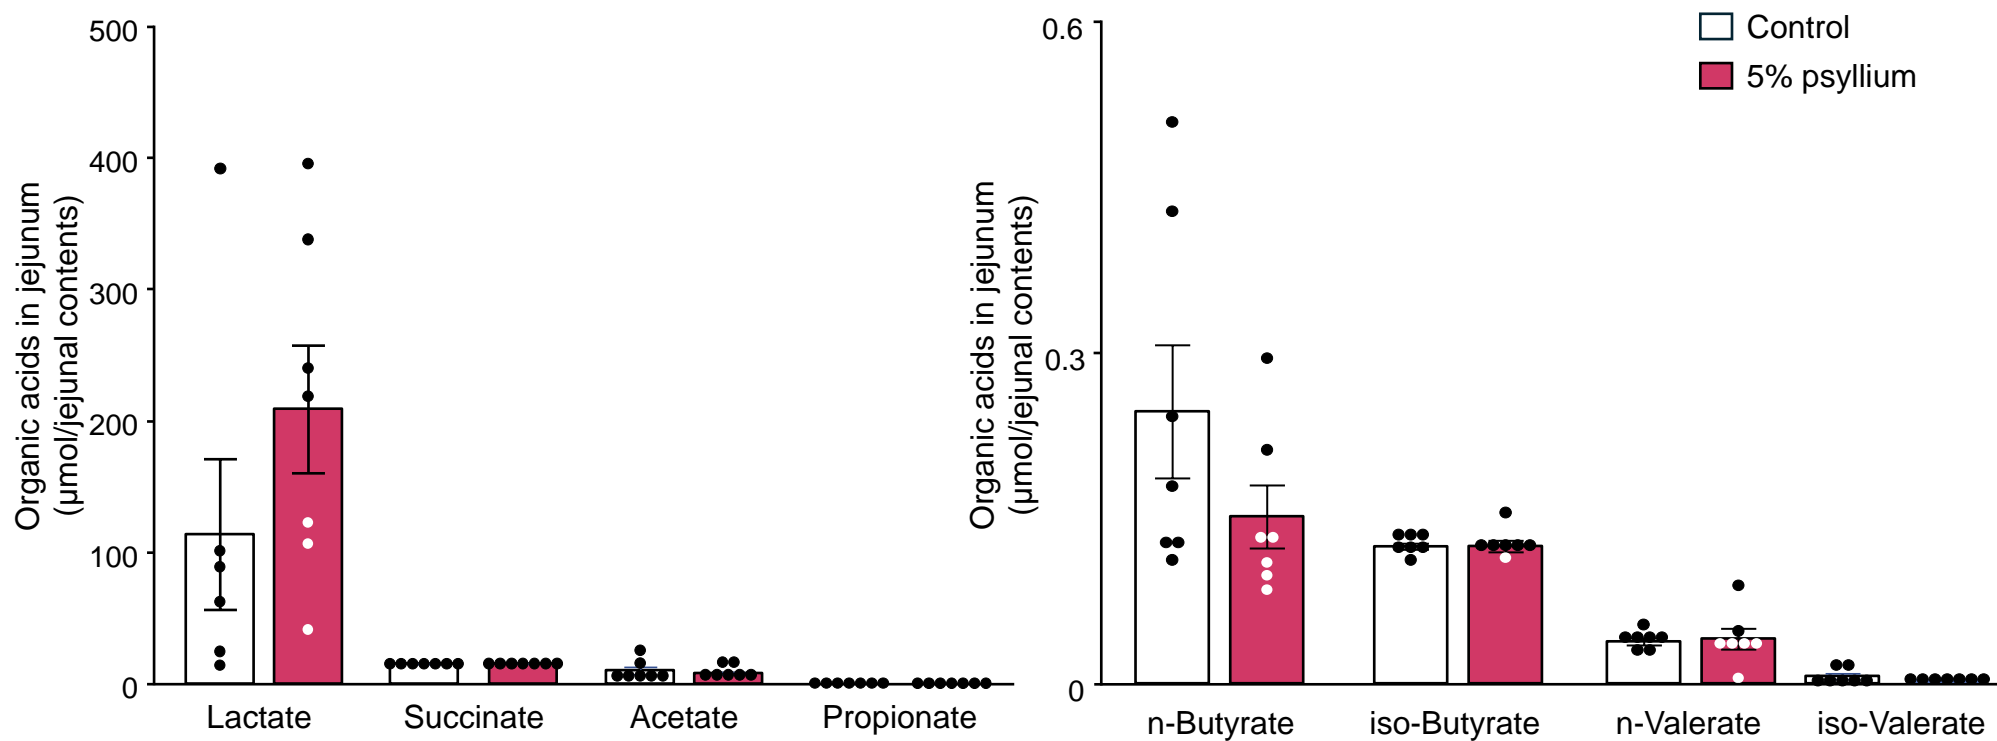

**Figure S7. | Organic acid pools in mouse jejunal contents.**

Mice were fed either a control diet or a 5% psyllium diet for 5 days. Lactate, succinate, acetate, propionate, n-butyrate, iso-butyrate, n-valerate, and iso-valerate were quantified by UPLC method (n=7 per group). Results are presented as mean  $\pm$  s.e.m. Statistical significance was assessed by the Tukey–Kramer post-hoc test.

pSTAT6 (110 kDa)

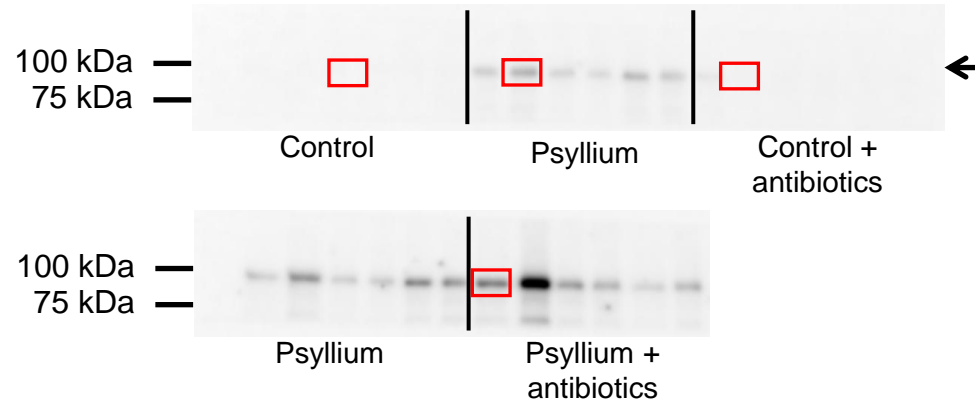

Ponceau S staining

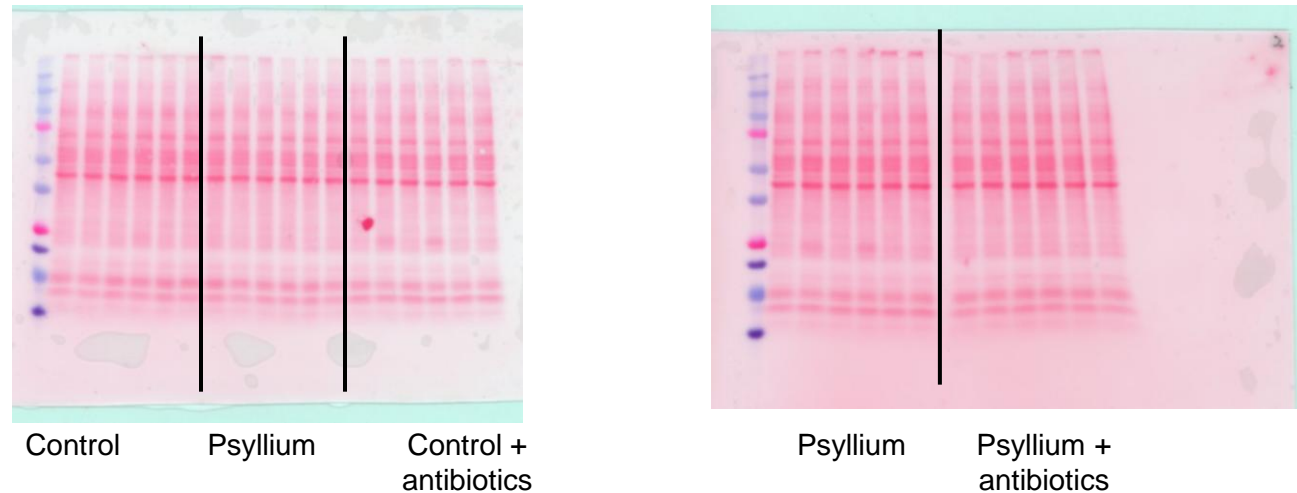

**Figure S8. | Uncropped and unprocessed immunoblot images corresponding to the immunoblots shown in Fig. 5.**

Mice were fed either a control diet or a 5% psyllium diet for 5 days. Antibiotics were administered via drinking water, starting 14 days before psyllium feeding. Protein levels of STAT6 phosphorylation in the jejunum were assessed by immunoblotting (n = 7 per group). Immunoblot analyses for each target were performed using multiple gels run in parallel under identical experimental conditions. After transfer to PVDF membranes, total protein loading was visualized by Ponceau S staining and used for normalization. Membranes were cut horizontally according to molecular weight markers and probed separately with primary antibodies. Red boxes indicate the regions used for quantification and presentation in the main figures.

SPRR2A (10 kDa)

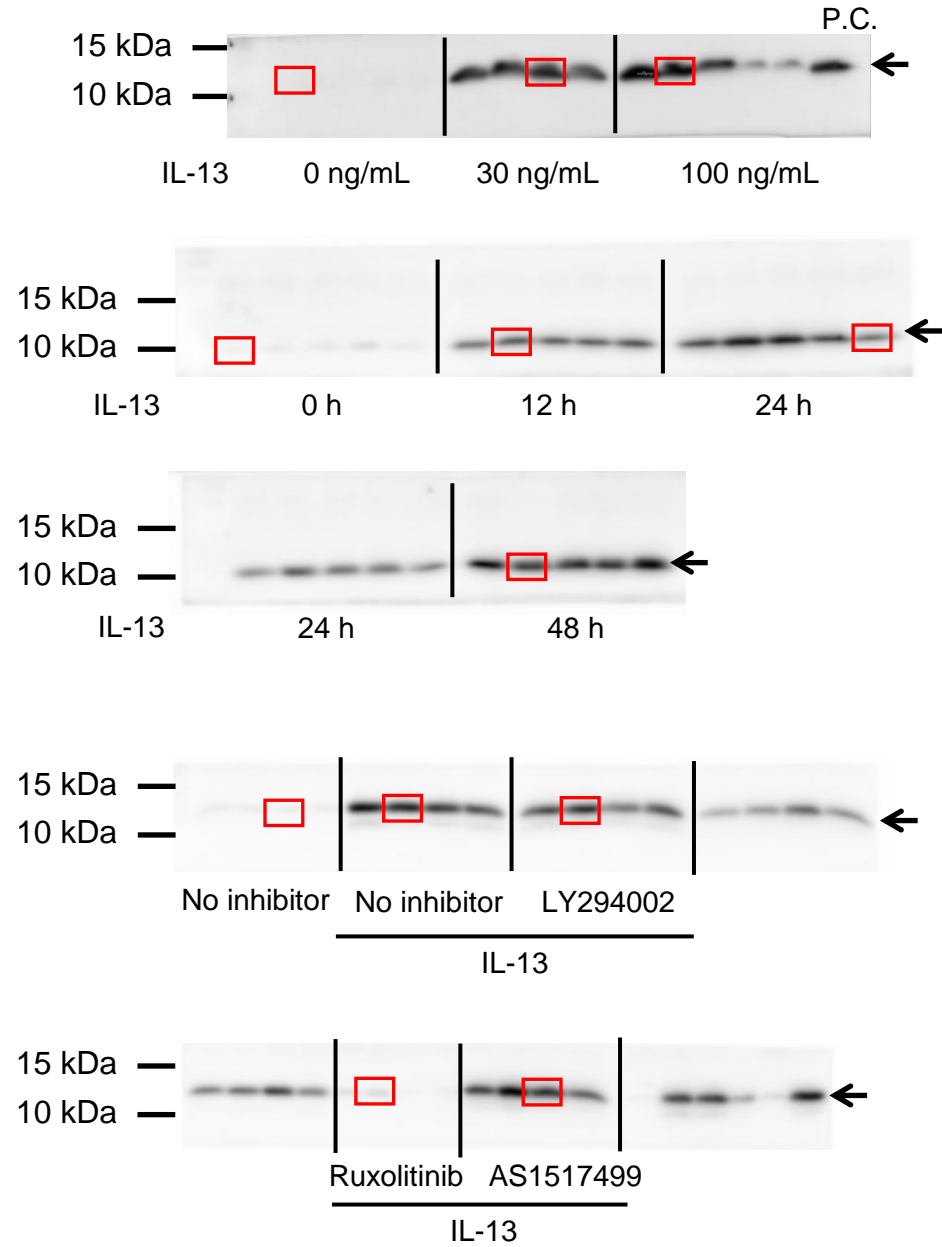

RELMβ (9 kDa)

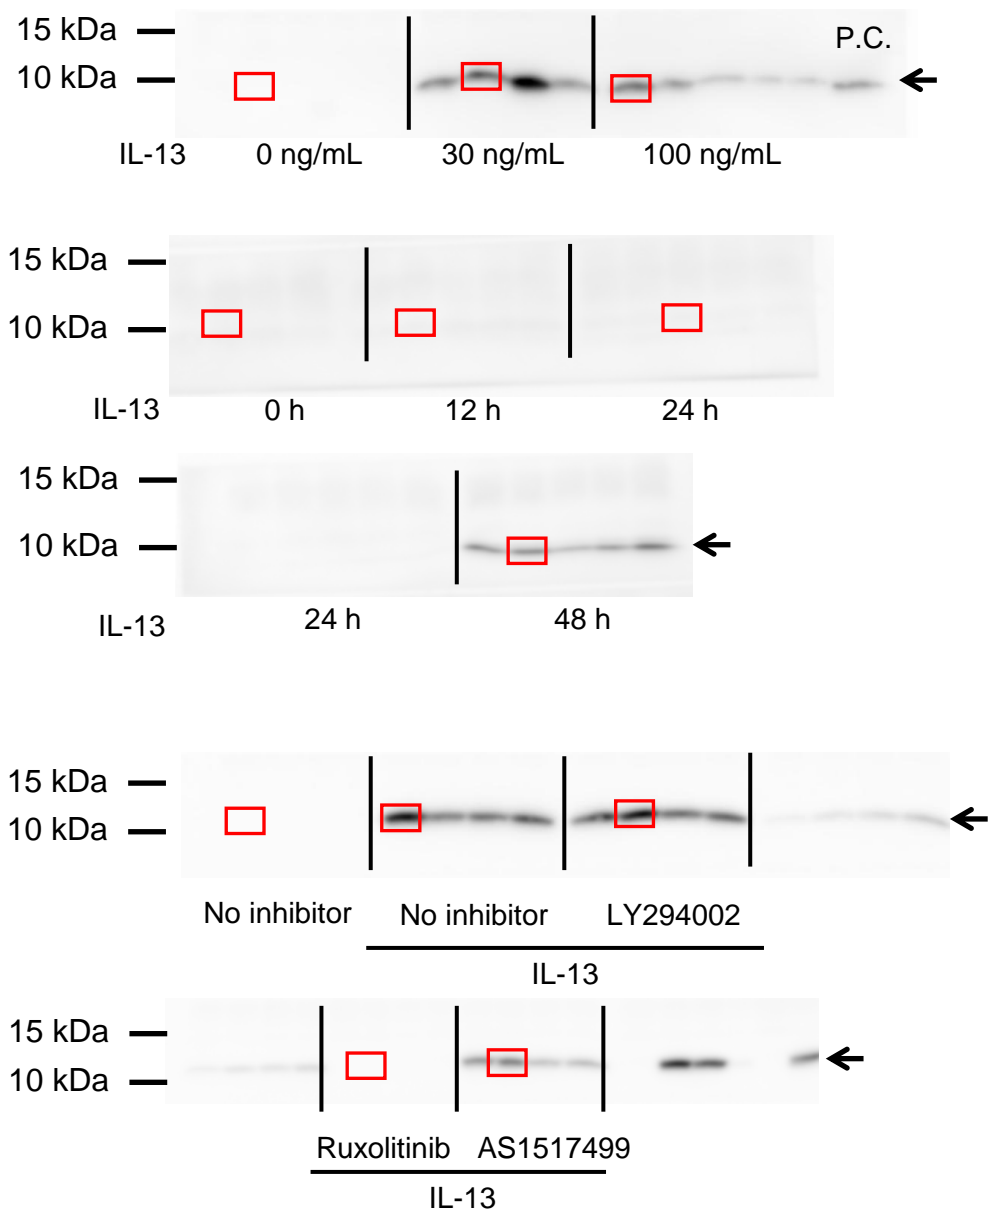

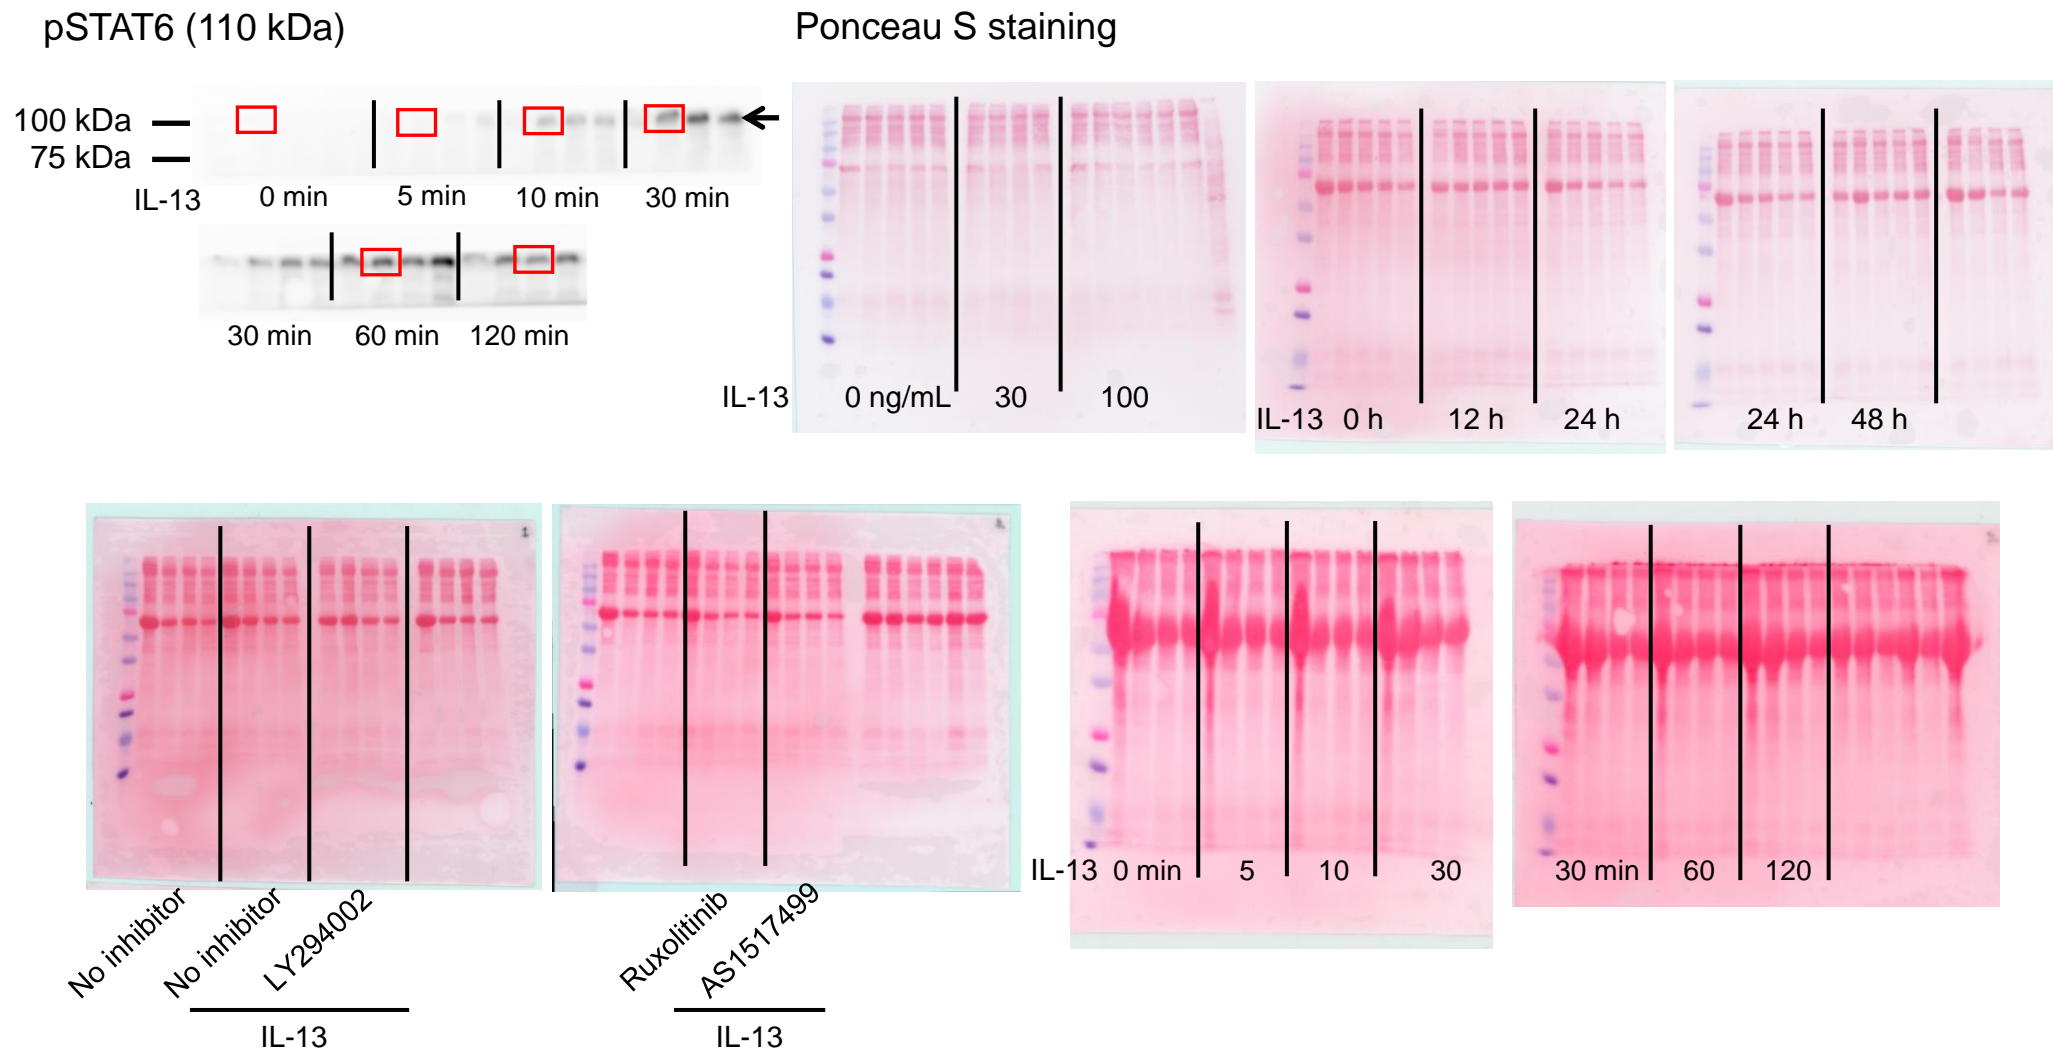

**Figure S9. | Uncropped and unprocessed immunoblot images corresponding to the immunoblots shown in Fig. 6.**

Organoids were established from mouse jejunum and stimulated with IL-13 (0, 30, or 100 ng/mL,  $n = 4-5$  per group). Time-course analysis of AMP expression following the IL-13 stimulation for the indicated times (0–48 h,  $n = 5$  per group). Organoids were treated with IL-13 (30 ng/mL) in the presence or absence of inhibitors targeting JAK1/2 [Ruxolitinib (10  $\mu$ M)], STAT6 [AS1517499 (10  $\mu$ M)], or PI3K [LY294002 (20  $\mu$ M)]. Protein levels of SPRR2A, RELM $\beta$ , and STAT6 phosphorylation were assessed by immunoblotting ( $n = 4$  per group). Immunoblot analyses for each target were performed using multiple gels run in parallel under identical experimental conditions. After transfer to PVDF membranes, total protein loading was visualized by Ponceau S staining and used for normalization. Membranes were cut horizontally according to molecular weight markers and probed separately with primary antibodies. Red boxes indicate the regions used for quantification and presentation in the main figures.

### SPRR2A (10 kDa)

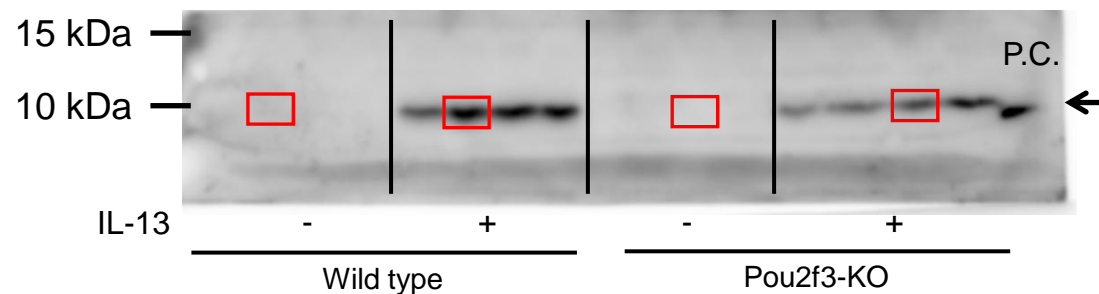

### Ponceau S staining

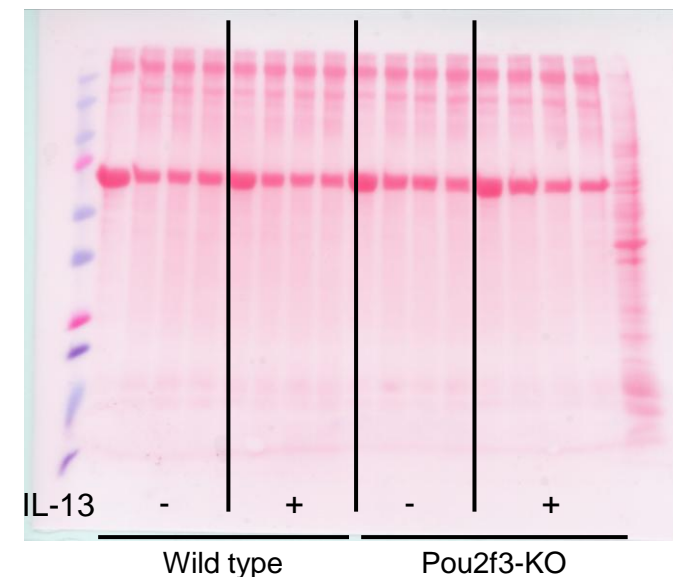

### RELMβ (9 kDa)

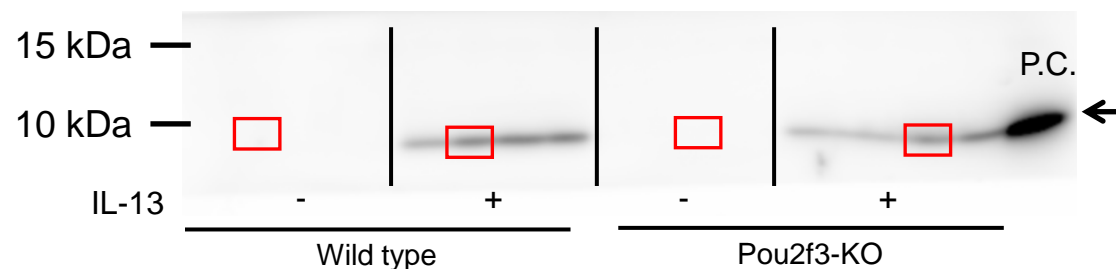

### pSTAT6 (110 kDa)

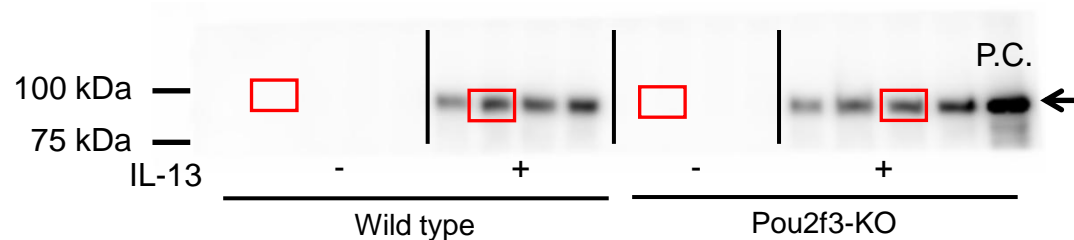

**Figure S10. | Uncropped and unprocessed immunoblot images corresponding to the immunoblots shown in Fig. 7.**

Organoids were established from the jejunum of WT and *Pou2f3*-KO mice and stimulated with or without IL-13 (30 ng/mL). Protein levels of SPRR2A, RELMβ, and STAT6 phosphorylation in the jejunum were assessed by immunoblotting (n = 7 per group). Immunoblot analyses for each target were performed using multiple gels run in parallel under identical experimental conditions. After transfer to PVDF membranes, total protein loading was visualized by Ponceau S staining and used for normalization. Membranes were cut horizontally according to molecular weight markers and probed separately with primary antibodies. Red boxes indicate the regions used for quantification and presentation in the main figures.



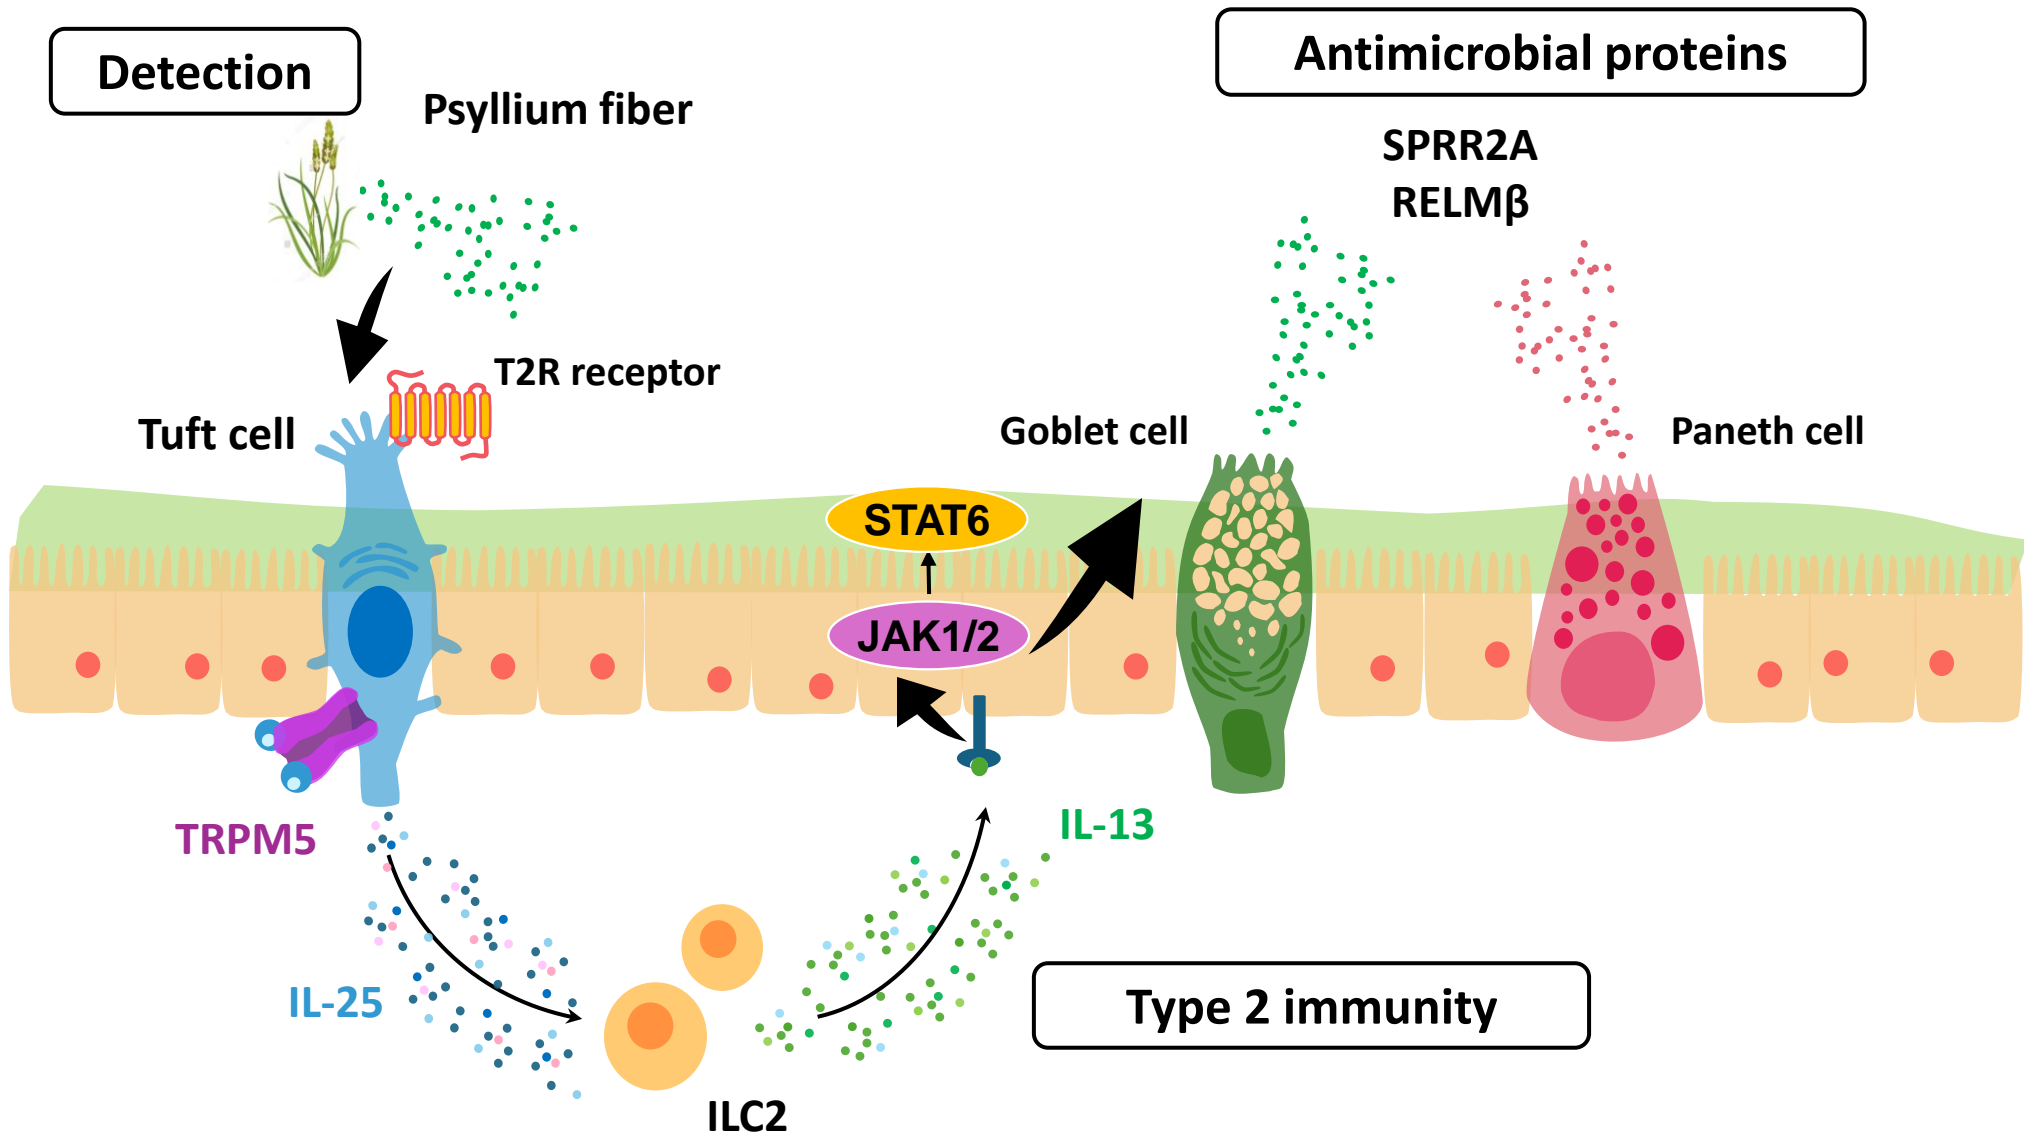

**Figure S11. | Supplemental psyllium fiber upregulates antimicrobial protein (SPRR2A, RELM $\beta$ ) production via tuft cell-ILC2-IL-13 circuit.** Dietary psyllium fiber is sensed by intestinal tuft cells, triggering the release of IL-25 to activate ILC2s. This tuft cell-ILC2 axis drives the production of IL-13, which emerges as the principal effector promoting antimicrobial protein (SPRR2A, RELM $\beta$ ) expression in intestinal epithelial cells via the JAK1/2-STAT6 pathway.

### Experiment 1

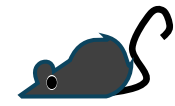

Wild type

VS

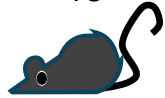

Pou2f3-KO

C57BL/6J, ♀  
9 weeks, n=6 or 8

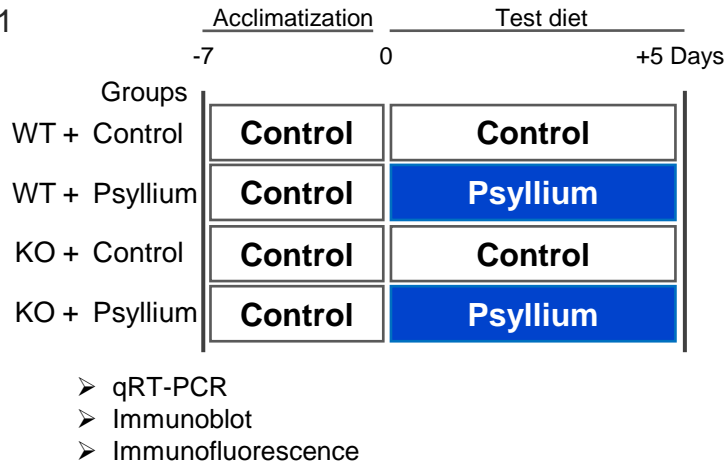

### Experiment 2

Triphenylphosphine oxide (TPPO)

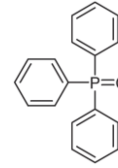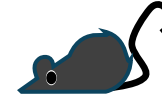

C57BL/6J, ♀  
8 weeks, n=7

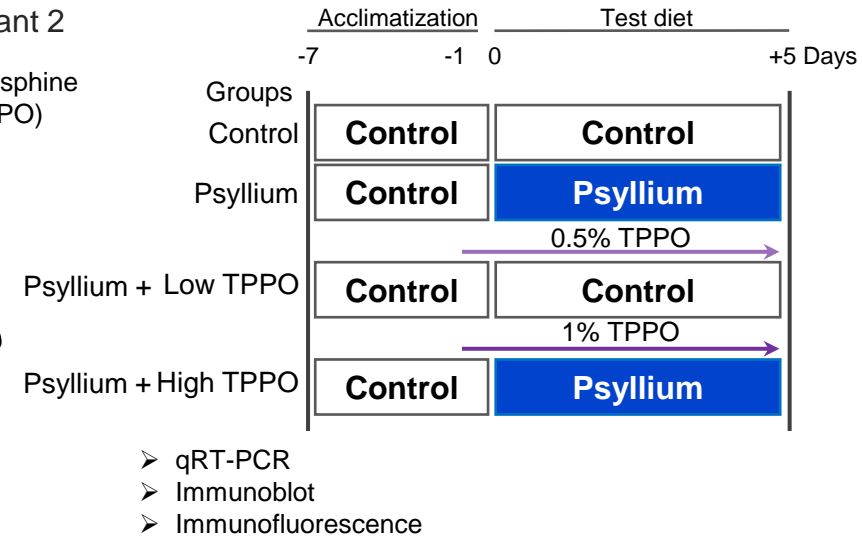

### Experiment 3

Psyllium Cellulase

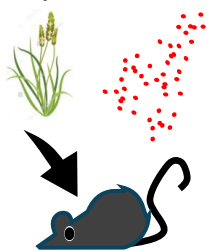

C57BL/6J, ♀  
8 weeks, n=7

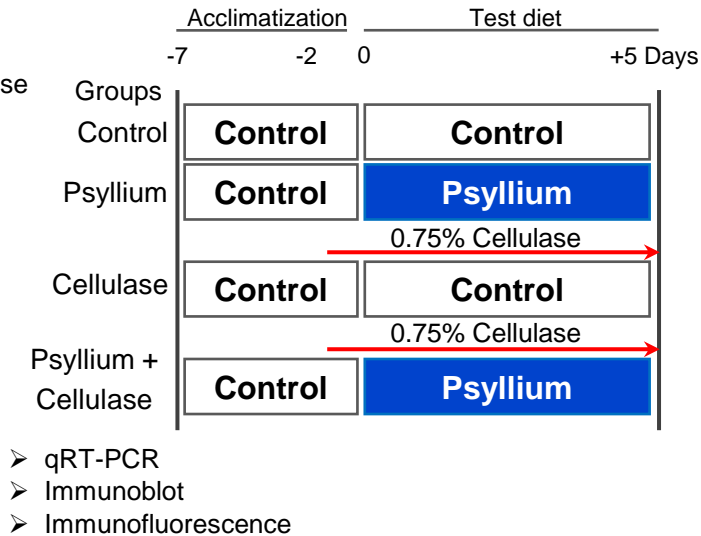

### Experiment 4

Psyllium Antibiotics

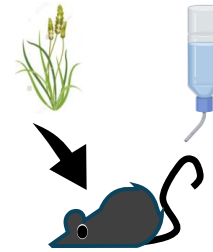

C57BL/6J, ♀  
8 weeks, n=6

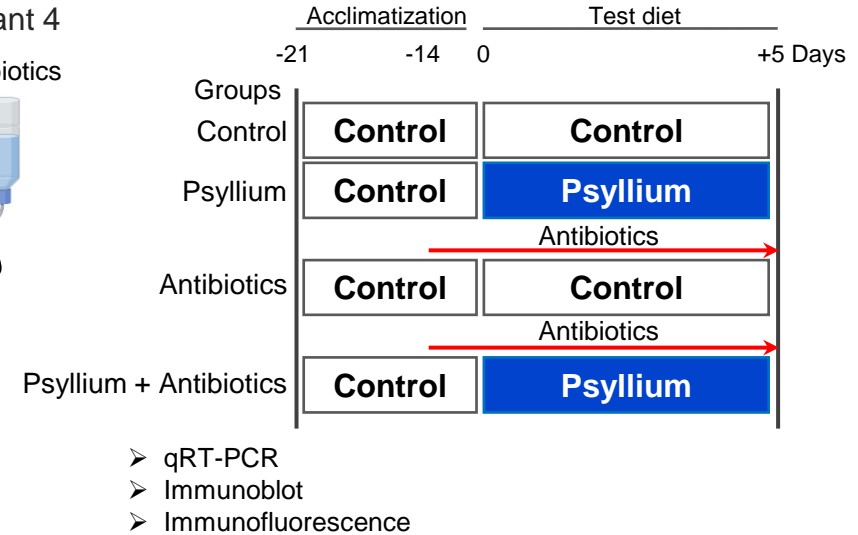

Supplementary Figure continues on the next page.

**Figure S12. | Experimental design and analytical workflow for animal experiments.**

Schematic overview of the experimental schedules and analytical procedures for Experiments 1–4.

Experiment 1: To assess whether dietary psyllium fiber induces antimicrobial protein (AMP) production in the absence of tuft cells, wild-type (WT) and tuft cell-deficient *Pou2f3* knockout (KO) mice were assigned to four groups: WT + control, WT + psyllium, KO + control, and KO + psyllium (n = 6 or 8 per group). Mice were fed control or 7.5% psyllium-containing diets for 5 days. Jejunal and ileal segments were collected for quantitative reverse transcription–polymerase chain reaction (qRT-PCR), immunoblotting, and immunofluorescence analyses.

Experiment 2: To examine the involvement of TRPM5-mediated chemosensory signaling, mice were treated with the TRPM5 inhibitor triphenylphosphine oxide (TPPO). Animals were allocated to four groups: control, psyllium, psyllium + 0.5% TPPO, and psyllium + 1.0% TPPO (n = 7 per group). The control group received the control diet for 5 days, whereas the other groups were fed a 7.5% psyllium diet. TPPO was incorporated into the diets at 0.5% or 1.0% (w/w), starting 1 day prior to psyllium feeding (total treatment period of 6 days). Jejunal and ileal tissues were subjected to qRT-PCR, immunoblotting, and immunofluorescence analyses.

Experiment 3: To determine whether the structural integrity of psyllium fiber is required for AMP induction, mice were assigned to four groups: control, psyllium, control + cellulase, and psyllium + cellulase (n = 6 per group). Control and control + cellulase groups were fed the control diet for 5 days, whereas the psyllium and psyllium + cellulase groups received a 7.5% psyllium diet. In the cellulase-treated groups, a cellulase preparation with xylanase activity was added to the diets at 0.75% (w/w). Jejunal and ileal segments were collected for qRT-PCR, immunoblotting, and immunofluorescence analyses.

Experiment 4: To evaluate the contribution of the gut microbiota to psyllium-mediated AMP induction, mice were randomly assigned to four groups: control, psyllium, control + antibiotics, and psyllium + antibiotics (n = 6 per group). Control and control + antibiotics groups were fed the control diet for 5 days, whereas psyllium and psyllium + antibiotics groups received a 5% psyllium diet. A broad-spectrum antibiotic cocktail was administered via drinking water starting 14 days before dietary intervention and continued throughout psyllium feeding (total of 19 days). Jejunal and ileal tissues were harvested for qRT-PCR, immunoblotting, and immunofluorescence analyses.

a

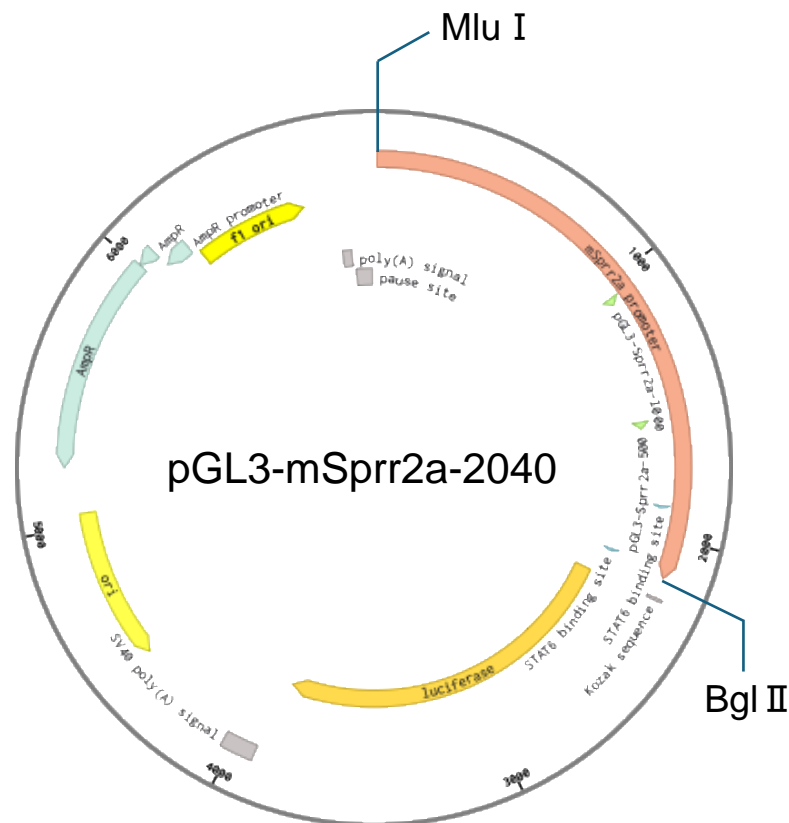

b

-2041 GGGTCATAAG AAATCTACTG GGTAAAGGCC CTTGATTGCC CTATGGTAAG TGCAGTAGCT  
 -1981 AATGAGAACT ATTCATAATG ATGTCATTGT TCAGCTCTTA GCCTCAGGTG CTAACAACAT  
 -1921 GGCTCTTTCC CTGAAGTGAC TCAGTCATAA CAGTGGCATT TTTGAATAAA CTCTTCAATA  
 -1861 TTGGCAGCAG CATTGACAGT TCTGACAAGC TGAAGTGTTC AGCTGAGGTT GACAGAGTAC  
 -1801 TCCTGTATTT TTCCAGCACA GCTGCTGGCT GCTTCAGAAA GTTTAAATAT TTCATTTTCC  
 -1741 TTGCCATCCT TTTCTTCTCT CTTTCTCTCT CTCTCTCTCT CTCTCTCTCT CTCTCTCTCT  
 -1681 CTCTATATAT ATATATATAT ATATATATAT ATATATATAT TTGACTTTTG AATTTTCTAG  
 -1621 TCACCTAATC ATTTTAAAT TTCTAATTGC CAGCAATGAC ACTTTAAATG TTGAATACAC  
 -1561 AGTCAGCCCT ACTGATTGAA TGAATGGTA AAGGGACAGG GATGGGAAGA GTCTGTAAAT  
 -1501 GCACTGACAG TATTTTCTGT GACCAATGAC TGCTAGCATC TGTCTTAAGA GGGAACAGTT  
 -1441 TGCCATCTTC TCTTGAAAT TTGGCATATG TAGGAGAAGA TGGTAGAGGG GTCGACATGT  
 -1381 TAAAGAACTT GTAGAAAAGA AAGAACAAC AATGCTTACA GGAAGAGTTT TGAAATACTG  
 -1321 TCTGTTGAAG TTATTAAATC TACATAGAAA GCTAATAAAT GAAATCCAAT GTATGATTCT  
 -1261 GACCTAACCT TATATCTCCC TGCTGTGAT TTCAGACTTT TAATGATCTG ATCAACCCTT  
 -1201 CTACTTTATT CTCTATTATT TATATGTGAT GGTTTCTTGT TCTTCTCCCT AGGGAGTACC  
 -1141 ACTGGGAAC ACCCAATGAG GTCTGCTAAA TAAATTTCTA ATTAATTCTC AGGATATTTG  
 -1081 TTCACTTTTC CCCATTTCCA TTGATTGAAT GATAATTGAA GGGAAGCAAA GAAAAAAGG  
 -1021 CACTGAGGAG ACTGGATGCC ACTCTACCAC <sup>-1000 bp</sup> CACAATCTGT CCAGGAAAG TAGCATCATT  
 -961 CTTAGAGGGA ATATGATTGA TTCTAAAAGG CAAAAAATGT AGGTCAAATG TGACATTATC  
 -901 CAAAGAAGAG AAAGATGAAG GGGGAAATC TATGCTGAGT AGGGTCACAG GTAGCCCAAT  
 -841 GATGTTAGCA CACAGGTATT ATTTCTCTGT GTTTATGGAA AAAAATCTGT AGTAAATAGA  
 -781 AGACCTGAC TCCATGGCTT ACTGAGGGCG CACTTGGTAT CTTTTGCTTC TCTTCTTCT  
 -721 AAGAACTTA TAAATATATG AGGAAAATAC CCCTCCACAT CTGAAAAAAA AAAGTGTAAT  
 -661 TGGCTTTACA CTCTAGCAAC GAACTAAGGA TGAATAAAG AGGGACAAAT AACCTTGAAT  
 -601 TTAAGACAAA TAGAGGGTCT CATGAAAAAA GGCTTATGGT CCCCAGTCAA <sup>-500 bp</sup> GAAAGAGATG  
 -541 TATCAAGCGG TTGAAAAAGC TCCAAGTACC ACAGTTACTG GAAGCAAGAG GAAAGAAAAG  
 -481 GACTCTGAGT CATAAGACTC AACCTAGTAA TGATAGCCAA GGGTGGGATA TTTTCTATTT  
 -421 TGTAGAGTCC CTGTCAGGCC AGTTATGGAT GAATGTGCAC TTAAGTTATC TCCTTCTAGC  
 -361 CTAGCAAGGC TGCTGTGAC CATCTGCTGC CCCTGGAGCA GAGCCACCTG CTGTGTTGCT  
 -301 CTTTTTGATG TGCCACTACC TGCTGAGGC CCAACTGCC TGAGGCTGAA TGAGTTCTCT  
 -241 TCAAGGAATC TTCTGGAGTT AACACTGAAC TGCAATCTTC ACAGTTCCC ACTAAAAGGC  
 -181 TGAATATCT ACTTCTAAGG <sup>STAT6 binding site</sup> AACTTGCTTG GCAAGGGAAG GGCTTCCCCT TTTCTTTACA  
 -121 AAGCATGTTT GCTGACATTA AATTTGAACC TTGAACAGGA AGCTTGCTCT GGTTTCTTTC  
 -61 TTATCAAGG <sup>TSS</sup> CAGCCAGCC CTTATTCTCT TTCAGGTTTC CAAAATGCCT TTCCAGAATA  
 +1 GAACCCAGCT CTGTGATCTG CTGGCCAGAC ACAACACCTG TACCAGCCCA TTACAGGGAA <sup>STAT6 binding site</sup>  
 +61 ATCCACTCCC CATGGGGTGA GGCAGGCAAT CCTAT

c

WT ---TTCTAAGGAA---  
 -168bp Mut. ---CGTTAAGAGC---

WT ---TTACAGGGAA---  
 +51bp Mut. ---CGGCAGGAGC---

**Figure S13. | Construction of the Sprr2a promoter–luciferase reporter plasmids.**

(a) Schematic map of the mouse Sprr2a promoter–luciferase reporter construct generated in the pGL3 basic vector. The Sprr2a promoter region spanning –2040 to +95 bp relative to the major transcription start site was cloned into the pGL3 vector using the MluI and BglII restriction sites. The plasmid map was designed using Benchling software. (b) Nucleotide sequence of the Sprr2a promoter region. Putative STAT6-binding motifs are underlined. (c) For the -168 bp site, the sequence 5'-TTC-3' and 5'-GAA-3' were mutated to 5'-CGT-3' and 5'-AGC-3', respectively. For the +51 bp site, the sequence 5'-TTA-3' and 5'-GAA-3' were mutated to 5'-CGG-3' and 5'-AGC-3', respectively.
